# Supplementary material for: Ownership and Agency of an Independent Supernumerary Hand Induced by an Imitation Brain-Computer Interface
Source: PubMed Central journal article supplement (PMC4909224; doi:10.1371/journal.pone.0156591), 2016-06-15
Supplement: pone.0156591.s002.pdf [file pone.0156591.s002.pdf]

## **Manuscript Data Variables Explained**

IBCI.GSR = (threats(1=pre, 2=early, 3=late, 4=post), hands(1=L, 2=R), subjects)

IBCI.Questionnaire = (subjects, questions)

IBCI.ControlQuestionnaire = (subjects, questions)

IBCI.Temperature = (time, subjects)

RHI.Questionnaire = (subjects, questions)

RHI.ControlQuestionnaire = (subjects, questions)

RHI.Temperature = (time, subjects)

RTHI.Questionnaire = (subjects, questions)

RTHI.ControlQuestionnaire = (subjects, questions)

RTHI.Temperature = (time, subjects)

In questionnaire variables, the questions are ordered as shown in the manuscript. The 7 step visual analogue scale (---,--, -, 0, +, ++, +++) corresponds to (1,2,3,4,5,6,7) in the data respectively.

In the Temperature variables; temperature is given in °C, the time dimension is in seconds and aligned at illusion onset.
